# Supplementary material
Source: Springer Nature journal article supplement (https://www.springermedizin.de/resource/supplementary/12906_2011_442_MOESM3_ESM.pdf/9519808)

Location 1

Location 2

Location 3

Preliminary Study  
(No treatment)  
(Rabbit-3)

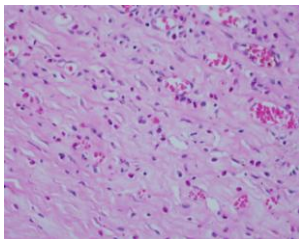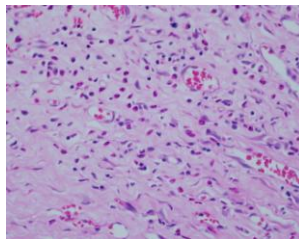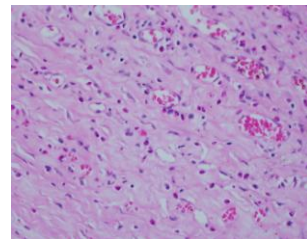

Conventional  
Treated Group  
(Rabbit-4)

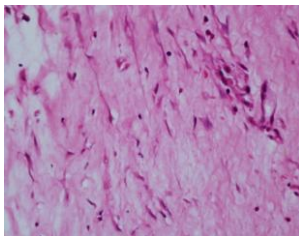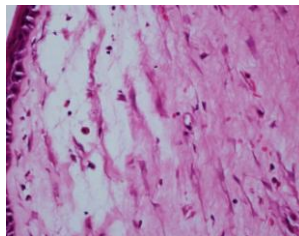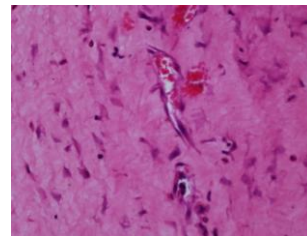

Honey  
Treated Group  
(Rabbit-5)

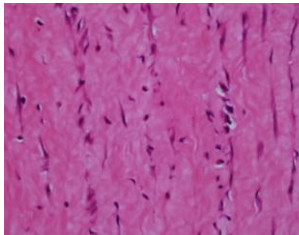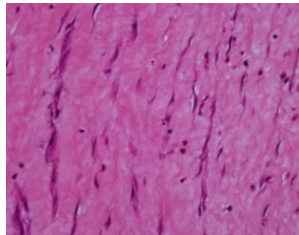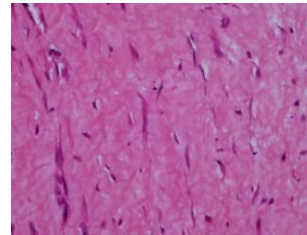

Supplement: MOESM3 [file 9519808]
